# Supplementary material for: Determinants of plasma levels of gcg and metabolic impact of glucagon receptor signalling – a UK Biobank study
Source: bioRxiv or medRxiv preprint supplement (doi:10.1101/2023.12.12.23299852), 2023-12-14
Supplement: Supplementary file [file media-1.pdf]

# ESM

**ESM Table 1:**

UK Biobank covariates used in the study.

| <b>Covariables</b>                      | <b>Definitions</b>                                                                                                                                                                                                                             | <b>UKB data field</b>              |
|-----------------------------------------|------------------------------------------------------------------------------------------------------------------------------------------------------------------------------------------------------------------------------------------------|------------------------------------|
| <b>Age</b>                              | Age when attended the assessment center at the initial assessment, truncated to a full year.                                                                                                                                                   | 21003                              |
| <b>Sex</b>                              | Acquired from central registry at recruitment.                                                                                                                                                                                                 | 31                                 |
| <b>Race</b>                             | Categorical variable, white and non-white. Indicates samples who self-identified as 'White British' at the initial touchscreen questionnaire and have very similar genetic ancestry based on a principal components analysis of the genotypes. | 22006                              |
| <b>Body mass index (BMI)</b>            | Weight/height <sup>2</sup> , kg/m <sup>2</sup> . BMI when attended the assessment center at the initial assessment.                                                                                                                            | 21001                              |
| <b>Liver fat</b>                        | %. Proton density fat fraction measured by MRI scan at instance 2.                                                                                                                                                                             | 40061                              |
| <b>Date attending assessment center</b> | Date of attending assessment centre.                                                                                                                                                                                                           | 53                                 |
| <b>Date of death</b>                    | Date of death. Acquired from central registry.                                                                                                                                                                                                 | 40000                              |
| <b>Date lost to follow up</b>           | Date lost to follow-up. This data was last updated in May 2017.                                                                                                                                                                                | 191                                |
| <b>Sex chromosome aneuploidy</b>        | Samples which were identified as putatively carrying sex chromosome configurations that are not either XX or XY                                                                                                                                | 22019                              |
| <b>HbA1c</b>                            | Baseline HbA1c levels, mmol/mol                                                                                                                                                                                                                | 30750                              |
| <b>Glucose</b>                          | Baseline glucose measurement, mmol/L                                                                                                                                                                                                           | 30740                              |
| <b>Weekly alcohol consumption</b>       | Calculated as the sum of beer, cider, champagne, white wine, red wine, fortified wine, spirits, and other alcoholic drinks.                                                                                                                    | 1588, 1578, 1608, 5364, 1568, 1598 |

|                    |                                                                                                                                                                                                   |                                                       |
|--------------------|---------------------------------------------------------------------------------------------------------------------------------------------------------------------------------------------------|-------------------------------------------------------|
| <b>Amino acids</b> | Plasma levels of amino acids measured by NMR metabolomics                                                                                                                                         | 23460, 23461,<br>23462, 23463,<br>23465, 23466, 23467 |
| <b>Proteomics</b>  | Only available through the Research Analysis Platform. A list of field names are available at <a href="https://github.com/nicwin98/UK-Biobank-GCG">https://github.com/nicwin98/UK-Biobank-GCG</a> |                                                       |

**ESM Table 2**

Mutations in the glucagon receptor included in the Frameshift variants group

| Frameshift mutations                                 |    |                       |
|------------------------------------------------------|----|-----------------------|
| Chrom_pos_ref_alt                                    | N  | Sequence Ontology     |
| chr17_81809019_A_G                                   | 1  | start lost            |
| chr17_81809021_GC_G                                  | 2  | frameshift truncation |
| chr17_81809027_CT_C                                  | 1  | frameshift truncation |
| chr17_81809039_G_GCGACC                              | 1  | frameshift elongation |
| chr17_81809040_C_T                                   | 5  | stop gained           |
| chr17_81809045_CCT_C                                 | 22 | frameshift truncation |
| chr17_81809064_C_CTGCT                               | 33 | frameshift elongation |
| chr17_81809838_C_A                                   | 1  | stop gained           |
| chr17_81810872_AC_A                                  | 1  | frameshift truncation |
| chr17_81810888_CG_C                                  | 3  | frameshift truncation |
| chr17_81810897_TCTC_T                                | 5  | inframe deletion      |
| chr17_81810907_CT_C                                  | 40 | frameshift truncation |
| chr17_81811122_TG_T                                  | 1  | frameshift truncation |
| chr17_81811273_T_TACA                                | 1  | inframe insertion     |
| chr17_81811283_CCCTGGGGGCCCTGCTCCTCGCCTTGGCCA<br>T_C | 12 | inframe deletion      |
| chr17_81811286_TG_T                                  | 3  | frameshift truncation |
| chr17_81811293_C_GT                                  | 1  | frameshift elongation |
| chr17_81811316_TG_T                                  | 1  | frameshift truncation |
| chr17_81811316_T_TG                                  | 14 | frameshift elongation |
| chr17_81811407_G_GCTGCA                              | 2  | frameshift elongation |
| chr17_81811422_CA_C                                  | 1  | frameshift truncation |
| chr17_81811441_CTGTT_C                               | 1  | frameshift truncation |
| chr17_81811710_C_A                                   | 6  | stop gained           |
| chr17_81811751_T_TG                                  | 1  | frameshift elongation |
| chr17_81811887_TGCCCC_T                              | 3  | frameshift truncation |
| chr17_81811911_CT_C                                  | 1  | frameshift truncation |
| chr17_81811923_CAAGT_C                               | 2  | frameshift truncation |
| chr17_81812181_AG_A                                  | 1  | frameshift truncation |
| chr17_81812216_G_A                                   | 8  | stop gained           |
| chr17_81812248_TC_T                                  | 1  | frameshift truncation |

|                       |    |                       |
|-----------------------|----|-----------------------|
| chr17_81812579_C_CA   | 5  | frameshift elongation |
| chr17_81812581_ACTT_A | 47 | inframe deletion      |
| chr17_81812598_CG_C   | 1  | frameshift truncation |
| chr17_81812607_C_T    | 2  | stop gained           |
| chr17_81812838_CT_C   | 1  | frameshift truncation |
| chr17_81812929_TC_T   | 1  | frameshift truncation |
| chr17_81813477_C_T    | 1  | stop gained           |
| chr17_81813509_G_A    | 3  | stop gained           |
| chr17_81813529_G_A    | 8  | stop gained           |
| chr17_81813609_AG_A   | 2  | frameshift truncation |
| chr17_81813624_C_T    | 15 | stop gained           |
| chr17_81813647_CT_C   | 1  | frameshift truncation |

**ESM Table 3: Definition of diseases**

|                                 |                                                                                                                                                                                                                                                                                                                                                                                                                                                                                                                                                                                                                                                                                                                                                                                                                                                                                         |                                                 |
|---------------------------------|-----------------------------------------------------------------------------------------------------------------------------------------------------------------------------------------------------------------------------------------------------------------------------------------------------------------------------------------------------------------------------------------------------------------------------------------------------------------------------------------------------------------------------------------------------------------------------------------------------------------------------------------------------------------------------------------------------------------------------------------------------------------------------------------------------------------------------------------------------------------------------------------|-------------------------------------------------|
| <b>Baseline type 2 diabetes</b> | Categorical variable. Cases were defined as probable and possible type 2 diabetes, and controls were defined as unlikely diabetes based on the Eastwood algorithm.                                                                                                                                                                                                                                                                                                                                                                                                                                                                                                                                                                                                                                                                                                                      |                                                 |
| <b>Incident type 2 diabetes</b> | Categorical variable. First, T2D was defined using ICD-10 codes for diabetes: E11 (“type 2 diabetes mellitus”) and E14 (“unspecified diabetes mellitus”) and the dates for the diagnosis (n = 3585). To refine the categorization further, the following steps were implemented: <ol style="list-style-type: none"> <li>1. Individuals additionally diagnosed with E10 (“type 1 diabetes mellitus”) were removed from T2D (n = 360).</li> <li>2. Individuals with probably and possibly type 2 diabetes based on the Estwood algorithm were removed from T2D (n = 1370).</li> <li>3. Individuals with ICD10 code of T2D given prior to the baseline were removed from T2D (n = 304).</li> <li>4. Individuals with baseline HbA1c &gt; 48 mmol/mol were removed from T2D (n = 159).</li> </ol> This classification process resulted in 1,562 incident cases of T2D (893 men, 658 women). | 130708<br>130714<br>41270<br>30750              |
| <b>MASLD</b>                    | Categorical variable. Cases were defined as > 5.5% fat on MRI PDFF and an alcohol consumption < 30g/day for men and < 20g/day for women. Individuals with MRI PDFF > 5.5% and an alcohol consumption > 30g/day for men and > 20g/day for women were excluded from the control group.                                                                                                                                                                                                                                                                                                                                                                                                                                                                                                                                                                                                    | 40061, 1588, 1578,<br>1608, 5364, 1568,<br>1598 |
| <b>Obesity</b>                  | Categorical variable. Cases were defined as BMI > 30 and controls as BMI < 25.                                                                                                                                                                                                                                                                                                                                                                                                                                                                                                                                                                                                                                                                                                                                                                                                          | 21001                                           |

#### ESM Table 4

Baseline characteristics of the UK Biobank cohort and the sub-cohort included in the proteomics analysis. Prevalent type 2 diabetes (T2D) was defined from the Eastwood algorithm [1].

| Characteristic                        | UKB cohort     | Proteomics sub-cohort |
|---------------------------------------|----------------|-----------------------|
| N                                     | 408,931        | 40,158                |
| Male sex                              | 187,863 (45.9) | 18,585 (46.3)         |
| Age                                   | 56.9 (8)       | 57.2 (8.1)            |
| BMI (kg/m <sup>2</sup> ) <sup>a</sup> | 27.4 (4.8)     | 27.4 (4.7)            |
| Prevalent T2D                         | 17,719 (4.3)   | 1842 (4.6)            |
| Liver fat (%)* <sup>a</sup>           | 4.8 (4.9)      | 4.8 (4.8)             |
| HbA1c (mmol/mol) <sup>a</sup>         | 36 (6.5)       | 36.1 (6.7)            |

Continuous variables are presented as mean (SD) and categorical variables as n (%)

\*Liver fat was quantified as MRI-PDFF at the second repeat (imaging) visit (median time from enrolment visit: 10.5 years).

<sup>a</sup>Missing data were present for BMI: a) n=1294 (0.3%), b) n=160 (0.4%); Liver fat: a) 384,507 (91.6%), b) 35,910 (89.4%); HbA1c: a) n=19,135 (4.7%), b) 1812 (4.5%).

## References

1. Eastwood, S.V., et al., *Algorithms for the Capture and Adjudication of Prevalent and Incident Diabetes in UK Biobank*. PLOS ONE, 2016. **11**(9): p. e0162388.
